# Supplementary material for: Association between excessive premature atrial complexes and cryptogenic stroke: results of a case–control study
Source: PubMed Central journal article supplement — BMJ Open. 2019 Jul 31;9(7):e029164. doi: 10.1136/bmjopen-2019-029164 (PMC6678064; doi:10.1136/bmjopen-2019-029164), 2019-07-31
Supplement: bmjopen-2019-029164.draft_revisions.pdf [file bmjopen-2019-029164.draft_revisions.pdf]

# BMJ Open

BMJ Open is committed to open peer review. As part of this commitment we make the peer review history of every article we publish publicly available.

When an article is published we post the peer reviewers' comments and the authors' responses online. We also post the versions of the paper that were used during peer review. These are the versions that the peer review comments apply to.

The versions of the paper that follow are the versions that were submitted during the peer review process. They are not the versions of record or the final published versions. They should not be cited or distributed as the published version of this manuscript.

BMJ Open is an open access journal and the full, final, typeset and author-corrected version of record of the manuscript is available on our site with no access controls, subscription charges or pay-per-view fees (<http://bmjopen.bmj.com>).

If you have any questions on BMJ Open's open peer review process please email [info.bmjopen@bmj.com](mailto:info.bmjopen@bmj.com)

# BMJ Open

## The association between excessive premature atrial complexes and cryptogenic stroke: results of a case – control study.

|                               |                                                                                                                                                                                                                                                                                                                                                                                                                                                                                                                                                                                                                                                                                                                                                                                                                                                                                                                                                                                                                                                                                                                                            |
|-------------------------------|--------------------------------------------------------------------------------------------------------------------------------------------------------------------------------------------------------------------------------------------------------------------------------------------------------------------------------------------------------------------------------------------------------------------------------------------------------------------------------------------------------------------------------------------------------------------------------------------------------------------------------------------------------------------------------------------------------------------------------------------------------------------------------------------------------------------------------------------------------------------------------------------------------------------------------------------------------------------------------------------------------------------------------------------------------------------------------------------------------------------------------------------|
| Journal:                      | <i>BMJ Open</i>                                                                                                                                                                                                                                                                                                                                                                                                                                                                                                                                                                                                                                                                                                                                                                                                                                                                                                                                                                                                                                                                                                                            |
| Manuscript ID                 | bmjopen-2019-029164                                                                                                                                                                                                                                                                                                                                                                                                                                                                                                                                                                                                                                                                                                                                                                                                                                                                                                                                                                                                                                                                                                                        |
| Article Type:                 | Research                                                                                                                                                                                                                                                                                                                                                                                                                                                                                                                                                                                                                                                                                                                                                                                                                                                                                                                                                                                                                                                                                                                                   |
| Date Submitted by the Author: | 15-Jan-2019                                                                                                                                                                                                                                                                                                                                                                                                                                                                                                                                                                                                                                                                                                                                                                                                                                                                                                                                                                                                                                                                                                                                |
| Complete List of Authors:     | Sajeev, Jithin; Monash University Eastern Health Clinical School, ; Eastern Health, Department of Cardiology<br>Koshy, Anoop; Monash University Eastern Health Clinical School; Monash University Eastern Health Clinical School<br>Dewey, Helen; Eastern Health, Neurosciences; Monash University Eastern Health Clinical School<br>Kalman, Jonathan; Royal Melbourne Hospital,<br>Rajakariar, Kevin; Eastern Health, Department of Cardiology<br>Tan, Mae; Eastern Health, Department of Cardiology<br>Street, Maryann; Deakin University, School of Nursing and Midwifery; Eastern Health, Eastern Health - Deakin University Nursing and Midwifery research Centre<br>Roberts, Louise; Monash University Eastern Health Clinical School; Eastern Health, Department of Cardiology<br>Cooke, Jennifer; Eastern Health, Department of Cardiology; Monash University Eastern Health Clinical School<br>Wong, Michael; Eastern Health, Department of Cardiology<br>Frost, Tanya; Eastern Health, Department of Neurosciences<br>Teh, Andrew W.; Monash University Eastern Health Clinical School; Eastern Health, Department of Cardiology |
| Keywords:                     | Pacing & electrophysiology < CARDIOLOGY, Stroke medicine < INTERNAL MEDICINE, Cardiology < INTERNAL MEDICINE                                                                                                                                                                                                                                                                                                                                                                                                                                                                                                                                                                                                                                                                                                                                                                                                                                                                                                                                                                                                                               |
|                               |                                                                                                                                                                                                                                                                                                                                                                                                                                                                                                                                                                                                                                                                                                                                                                                                                                                                                                                                                                                                                                                                                                                                            |

SCHOLARONE™  
Manuscripts

1  
2  
3 **The association between excessive premature atrial complexes and cryptogenic stroke:**  
4 **results of a case – control study.**  
5

6 Jithin K. Sajeev, MBChB<sup>1,2</sup>, Anoop N. Koshy, MBBS<sup>1</sup>, Helen Dewey, MBBS, PhD<sup>1,3</sup>,  
7  
8 Jonathan M. Kalman, MBBS, PhD<sup>5</sup>, Kevin Rajakariar, MBBS<sup>2</sup>, Mae C. Tan, MBBS<sup>2</sup>,  
9  
10 Maryann Street, PhD<sup>4</sup>, Louise Roberts, PhD<sup>1,2</sup>, Jennifer C. Cooke, MBBS<sup>1,2</sup>, Michael C.  
11  
12 Wong, MBBS, PhD<sup>2</sup>, Tanya Frost, RN<sup>3</sup>, Andrew W. Teh, MBBS, PhD<sup>1,2</sup>  
13  
14  
15

16 **Affiliations**  
17  
18

19 <sup>1</sup>Eastern Health Clinical School, Monash University, Victoria, Australia  
20  
21

22 <sup>2</sup>Department of Cardiology, Eastern Health, Victoria, Australia  
23  
24

25 <sup>3</sup>Department of Neuroscience, Eastern Health, Victoria, Australia  
26  
27

28 <sup>4</sup>School of Nursing and Midwifery, Deakin University, Victoria, Australia  
29  
30

31 <sup>5</sup>Department of Cardiology, The Royal Melbourne Hospital, Victoria, Australia  
32  
33

34 **Corresponding Author:**  
35  
36

37 A/Prof. Andrew W Teh  
38  
39

40 Department of Cardiology, Box Hill Hospital,  
41  
42

43 Level 2, Building B, 8 Arnold Street, Box Hill,  
44  
45

46 VIC 3128, Australia  
47  
48

49 Phone: +61 3 9895 4833  
50  
51

52 Email: [andrew.teh@easternhealth.org.au](mailto:andrew.teh@easternhealth.org.au)  
53  
54  
55  
56  
57

58 **Word Count: 2207**  
59  
60

## Abstract

**Objective:** Recent anticoagulation trials in all-comer cryptogenic stroke patients have yielded equivocal results, reinvigorating the focus on identifying reproducible markers of an atrial myopathy. We investigated the role of excessive premature atrial complexes (PACs) in ischaemic stroke, including cryptogenic stroke and its association with vascular risk factors.

**Methods and Results:** A case control study was conducted utilising a multi-centre institutional stroke database to compare 461 patients with an ischaemic stroke or transient ischaemic attack (TIA) with a control group consisting of age matched patients without prior history of ischaemic stroke/TIA. All patients underwent 24-hour Holter monitoring during the study period and atrial fibrillation was excluded.

An excessive PAC burden, defined as  $\geq 200$  PACs/24 hours, was present in 25.6% and 14.7% ( $p < 0.01$ ), of stroke/TIA and control patients respectively. On multivariate regression, excessive PACs conferred the highest risk for ischaemic stroke/TIA (OR 1.97; 95% confidence interval (CI): 1.29 – 3.02;  $p < 0.01$ ) and exceeded risk conferred by smoking (OR 1.58; CI: 1.06 – 2.36;  $p < 0.05$ ) and hypertension (OR 1.53; CI: 1.07 – 2.17;  $p < 0.05$ ).

Excessive PACs remained the strongest independent risk factor for the cryptogenic stroke subtype (OR 1.95; CI: 1.16 – 3.28;  $p < 0.05$ ). Vascular risk factors that promote atrial remodelling, increasing age ( $\geq 75$  years OR 3.64; CI: 2.08 – 6.36;  $p < 0.01$ ) and hypertension (OR 1.54; CI: 1.01 – 2.34;  $p < 0.05$ ) were independently associated with excessive PACs.

**Conclusions:** Excessive PACs are independently associated with cryptogenic stroke and may be a reproducible marker of atrial myopathy. Prospective studies assessing their utility in guiding stroke prevention strategies are warranted.

**Keywords:** Stroke; Atrial premature complexes; Cryptogenic stroke; Embolic stroke of undetermined source.

### Strength and limitations of this study

- This study employed a case control design to compare atrial rhythm abnormalities during Holter monitoring in patients with ischaemic stroke and an aged match control group.
- This study analysed the association between premature atrial complexes and cryptogenic stroke subtype, after excluding atrial fibrillation.
- This study analysed the association between specific vascular risk factors and premature atrial complexes.
- This study is limited by a lack of prolonged continuous cardiac monitoring that may have led to an underestimation of the presence of atrial fibrillation.

## Introduction

Approximately 100,000 strokes occur every year in the United Kingdom, with 1 in 4 survivors experiencing another stroke<sup>1</sup>. While 85% of all strokes are ischaemic in nature, 25% - 35% of these are labelled cryptogenic, as a clear cause is not identified.<sup>2</sup> Subclinical paroxysmal AF is postulated to be the cause for a significant proportion of these cryptogenic strokes.<sup>3,4</sup> However, despite prolonged rhythm monitoring, occult AF occur in only a small proportion of patients.<sup>5,6</sup>

With the recent equivocal results of randomised controlled anticoagulation trials in all-comer patients with embolic stroke of undetermined source, there has been a heightened focus in identifying reproducible markers of an atrial myopathy. Premature atrial complexes have been thought to be a benign phenomenon with a prevalence in the general population that ranges from 6% - 29%.<sup>7</sup> A limited number of studies have shown a significant association between excessive PACs and ischaemic stroke, suggesting their relevance as a marker of atrial myopathy.<sup>8-10</sup> However, these have not delineated whether excessive PACs confer an increased risk for the cryptogenic stroke subtype. In addition, no studies have assessed the pathophysiological basis of an increased PAC burden and whether individual vascular risk factors that promote stroke independently correlate with excessive PAC burden.<sup>11</sup> We sought to determine the association between excessive PACs and ischaemic stroke, including the cryptogenic stroke subtype and their relationship to conventional risk factors.

## Methods

A multicentre case-control study was conducted among consecutive patients who presented with an ischaemic stroke or TIA between May 2011 and December 2015. Patients within the stroke/TIA group were identified through a prospectively maintained institutional stroke

1  
2  
3 database that covered three tertiary, university hospitals. Stroke subtypes were determined  
4  
5 according to the Trial of Org 10172 in Acute Stroke Treatment (TOAST) classification<sup>12</sup>.  
6  
7

8  
9 Inclusion criteria were: 1) age  $\geq 18$  years; 2) adjudicated to have had an ischaemic stroke/TIA  
10  
11 by the stroke service and 3) underwent 24-hour Holter monitoring following their index  
12  
13 stroke/TIA. Exclusion criteria were: 1) history of atrial fibrillation, atrial flutter or a  
14  
15 subsequent diagnosis of these arrhythmias on inpatient telemetry, Holter monitoring or during  
16  
17 follow up; 2) underlying severe cardiomyopathy with an ejection fraction  $< 35\%$ ; 3) previous  
18  
19 coronary artery bypass grafting; 4) recent myocardial infarction or 5) severe chronic  
20  
21 obstructive airways disease.  
22  
23

24  
25 Eligible patients were compared to a group of age-matched controls, without prior history of  
26  
27 stroke or AF and underwent outpatient Holter monitoring. The control group were composed  
28  
29 of patients that underwent investigation of chest pain, syncope, pre-syncope and palpitations.  
30  
31 The stroke/TIA and control groups were age matched with the same exclusion criteria  
32  
33 applied.  
34  
35

### 36 37 *Clinical assessment and outcome measures* 38 39

40  
41 All included patients adjudicated as having a stroke/TIA underwent investigation and  
42  
43 treatment as per the national stroke guidelines recommendation for standard of care.<sup>13</sup> This  
44  
45 included physical examination, blood measurements, 12 lead ECG, pulse oximetry, computed  
46  
47 tomography of the brain (CTB), inpatient cardiac monitoring and vascular assessment. All  
48  
49 patients underwent Holter monitoring with 24 hours of continuous rhythm capture utilising  
50  
51 the SEER Light Holter Monitor (GE Healthcare, Milwaukee, USA). Data were analysed  
52  
53 offline upon completion of the monitoring period by cardiac technicians and subsequently  
54  
55 reviewed by a cardiac electrophysiologist blinded to the study hypothesis. Rhythm analysis  
56  
57  
58  
59  
60

1  
2  
3 was conducted using MARS Ambulatory ECG Analysis System (GE Healthcare, Milwaukee,  
4  
5 USA).

6  
7  
8 Baseline demographic and clinical data were collected from electronic health records along  
9  
10 with vascular risk factors to allow for calculation of a CHA<sub>2</sub>DS<sub>2</sub>VASc score, medication use  
11  
12 and to identify presentations with recurrent stroke or TIA. Based on prior literature, we  
13  
14 defined excessive PAC burden as  $\geq 200$  PACs/24 hours and a long atrial run as  $\geq 20$  beats.<sup>14 15</sup>

### 17 18 *Statistical methods*

19  
20  
21 Demographic data, disease status and outcome measures are presented as proportions and  
22  
23 summarised by descriptive statistics. Data were tested for normality and parametric or non-  
24  
25 parametric tests applied as appropriate. Correlation trends were analysed using Spearman's  
26  
27 rho for non-parametric data. A p-value  $<0.05$  was deemed statistically significant and a 95%  
28  
29 confidence interval (CI) is presented where applicable. Markers associated with stroke/TIA  
30  
31 and excessive PACs were identified by univariate and multivariate logistical regression. Any  
32  
33 variable with a p value  $<0.25$  on univariate analysis was included in multivariate analyses.

34  
35  
36 All statistical analysis was performed with SPSS Statistics 24.0 (IBM, USA).

### 37 38 39 *Patient and public involvement*

40  
41  
42 Public involvement was sought after the methods and outcome measures were identified. The  
43  
44 protocol and study design were reviewed by human research ethics committee, 45% of whom  
45  
46 were members of the public.  
47  
48

### 49 50 51 *Ethics approval and data sharing*

52  
53  
54 The research protocol was approved by the institutional Human Research Ethics Committee  
55  
56 and written informed consent was not deemed necessary by the committee (approval number:  
57  
58  
59  
60



1  
2  
3 LR09/2016). The raw data will be made available by the corresponding author upon  
4  
5 reasonable request.  
6  
7  
8  
9

## 10 11 **Results**

12  
13  
14 In total, 537 patients presented with a stroke/TIA during the study inclusion period and  
15  
16 underwent Holter monitoring. Following exclusions, 461 patients with a stroke/TIA were  
17  
18 compared against 251 age-matched patients that underwent Holter monitoring during the  
19  
20 same time period (Figure 1). The median time to Holter monitoring following the stroke or  
21  
22 TIA was 40 days.  
23  
24

### 25 26 *Ischaemic stroke and PAC burden*

27  
28  
29 Baseline characteristics stratified according to study groups are shown in Table 1. In both  
30  
31 groups, the mean age was 70 years and the majority of patients were male. Stroke/TIA  
32  
33 patients were significantly more likely to have comorbidities of hypertension, diabetes  
34  
35 mellitus, dyslipidaemia, peripheral vascular disease and a prior history of smoking. There  
36  
37 were 79 patients with a prior cerebrovascular event in the stroke/TIA group. On admission,  
38  
39 there was significantly higher use of statins in the stroke/TIA cohort, however no difference  
40  
41 was evident in the use of antiplatelet therapy or oral anticoagulants. The prevalence of  
42  
43 excessive PACs were significantly higher in the stroke/TIA group (25.6% vs 14.7%,  $p =$   
44  
45 0.001), however atrial runs of  $\geq 20$  beats were not significantly different (Table 1).  
46  
47  
48

49  
50  
51 Multivariate analysis showed female sex, hypertension, history of smoking and excessive  
52  
53 PACs were significantly associated with a stroke/TIA; excessive PACs conferred the highest  
54  
55 risk for stroke/TIA with an odds ratio of 1.97(CI: 1.29 – 3.02) (Table 2). Analysis of PAC  
56  
57 burden revealed a skewed distribution, median PACs/24 hours and longest atrial ectopic runs  
58  
59  
60

1  
2  
3 were significantly higher in the stroke/TIA group. However, number of beats in runs of  
4  
5 greater than 3 beats was not significantly different between the 2 groups.  
6  
7

### 8 *Cryptogenic Stroke and PAC burden*

10  
11 One hundred and eighty-five patients with cryptogenic stroke, after excluding TIA, were  
12  
13 compared with 251 patients in the control group. The mean age was not significantly  
14  
15 different between the control and cryptogenic stroke group, 70.5 and 68.9 years respectively.  
16  
17

18 Cryptogenic stroke was significantly associated with excessive PAC burden, female sex,  
19  
20 hypertension, diabetes mellitus, smoking, obstructive sleep apnoea and a higher median  
21  
22 CHA<sub>2</sub>DS<sub>2</sub>VASc score on univariate analysis. Excessive PACs (OR: 1.95; CI: 1.16 – 3.28),  
23  
24 female sex (OR: 1.78; CI: 1.19 – 2.67) and hypertension (OR: 1.67; CI: 1.05 – 2.64)  
25  
26 maintained significant and independent associations with cryptogenic stroke subtype on  
27  
28 multivariate logistical regression (Table 2).  
29  
30  
31  
32

### 33 *Vascular risk factors and PAC burden*

34  
35  
36 Increasing CHA<sub>2</sub>DS<sub>2</sub>VASc score was associated with increasing median PACs in both groups  
37  
38 (Figure 2). A CHA<sub>2</sub>DS<sub>2</sub>VASc score greater than 3 in the control group and 2 in the stroke/TIA  
39  
40 group were associated with an excessive PAC burden. However, only a moderate to weak  
41  
42 correlation was evident between increasing CHA<sub>2</sub>DS<sub>2</sub>VASc score and increasing PACs/24 hours in  
43  
44 all patients ( $r_s = 0.32$ ,  $p < 0.001$ ), control patients ( $r_s = 0.24$ ,  $p < 0.001$ ) and stroke/TIA patients ( $r_s$   
45  
46  $= 0.32$ ,  $p < 0.001$ ) respectively.  
47  
48  
49  
50

51 In all patients, age, hypertension, diabetes mellitus and peripheral vascular disease were significant  
52  
53 univariate predictors of excessive PACs. However only age and hypertension remained significant  
54  
55 independent predictors of excessive PACs on regression analysis, with age  $\geq 75$  being the strongest  
56  
57 predictor for excessive PACs (Table 3).  
58  
59  
60

## Discussion

In this study, we compared the differences in PAC burden between patients with a stroke/TIA and an age-matched control population, after excluding AF. Excessive PAC burden was significantly more common in the stroke/TIA group. An important new finding in our study was that excessive PACs demonstrated the strongest independent association for the cryptogenic stroke subtype, after adjusting for conventional risk factors (OR: 1.95; CI: 1.16 – 3.28). There was a stepwise rise in PAC burden with increasing number of vascular risk factors; age and hypertension were independent risk factors associated with excessive PACs.

Investigators have previously demonstrated a significantly higher PAC burden in patients that develop incident AF and ischemic stroke.<sup>14 16</sup> Our work builds on existing work from Engstrom et al. that demonstrated a high PAC burden conferred a 1.9 times higher risk for ischaemic stroke.<sup>15</sup> The current study similarly showed 1.97 times rise in odds for ischaemic stroke. Prior studies have also shown an association between runs of PACs and ischaemic stroke in patients without documented AF<sup>17</sup>. The Copenhagen Holter study, a cohort study that analysed the risk for stroke with an elevated PAC burden, defined excessive supraventricular ectopic activity as a composite of either >30 PACs/hour or a run of >20 PACs, and found a positive correlation with increased stroke and death.<sup>9 18</sup> In contrast, we did not show a significant difference in PAC runs >20 beats between the two groups.<sup>19</sup> This apparent discrepancy is likely due to a lack of standardised definitions for excessive PACs and treating atrial premature runs  $\geq 20$  beats as a standalone variable in the current study, instead of a composite measure.

The present study specifically analysed the association between excessive PACs and cryptogenic stroke subtype. It demonstrated an independent association between cryptogenic stroke subtype and excessive PACs with an odds ratio of 1.95. This is an important finding

1  
2  
3 and lends further support to the hypothesis, that excessive PACs may be the manifestation or  
4 marker of underlying atrial myopathy, that confers an increased risk for cryptogenic stroke.  
5

6  
7 Further, similar to AF, the risk for ischaemic stroke in the presence of an excessive PAC  
8 burden appear to be modulated by vascular risk factors. A CHA<sub>2</sub>DS<sub>2</sub>VASc score of 2  
9  
10 conferred a similar risk for ischaemic stroke in patients with excessive PACs, as with AF.<sup>9</sup>  
11

12  
13 An increasing CHA<sub>2</sub>DS<sub>2</sub>VASc score was significantly associated with increasing median  
14  
15 PAC burden in both the control and stroke/TIA group. However, despite the positive  
16  
17 correlation between CHA<sub>2</sub>DS<sub>2</sub>VASc score and premature atrial complexes, the strength of the  
18  
19 correlation itself remained weak. This was suggestive of differential effects of the various  
20  
21 components of CHA<sub>2</sub>DS<sub>2</sub>VASc score in contributing to a high PAC burden.  
22  
23  
24  
25

26  
27 To our knowledge, this is the first study to evaluate the independent association between  
28  
29 specific vascular risk factors and an excessive PAC burden. The independent contribution of  
30  
31 the various risk markers that make up CHA<sub>2</sub>DS<sub>2</sub>VASc score have not been assessed  
32  
33 previously.<sup>9 18 20</sup> Delineation of these specific risk factors that contribute to excessive PACs  
34  
35 provides insights into the potential pathophysiological basis for excessive PAC.  
36  
37  
38

39  
40 Increasing age and hypertension were independently and significantly associated with  
41  
42 excessive PACs in the present study. This is consistent with electro-anatomical studies that  
43  
44 demonstrated slower conduction velocities and both global and regional reduction in atrial  
45  
46 voltages with increasing age and hypertension<sup>21 22</sup>. Such areas corresponded to delayed  
47  
48 enhancement on magnetic resonance imaging and histological fibrosis<sup>23,24</sup>. Thrombogenesis  
49  
50 associated with this underlying atrial remodelling may help explain a significant proportion  
51  
52 of strokes currently classified as cryptogenic. Both advancing age and hypertension are also  
53  
54 associated with small and large vessel stroke subtypes. In addition to atrial remodelling, it is  
55  
56 likely that vascular risk factors promote thrombogenesis and ischaemic stroke through  
57  
58  
59  
60

1  
2  
3 multiple pathways including arterial endothelial dysfunction, and atherosclerosis with  
4  
5 localised plaque rupture.<sup>25</sup>  
6  
7

8 Our report of the independent association between excessive PACs and cryptogenic stroke  
9  
10 further implicates a risk factor driven atrial substrate abnormality in its pathogenesis. These  
11  
12 findings are clinically relevant as the results of a recently concluded large multicentre  
13  
14 randomised controlled trial failed to demonstrate a benefit for oral anticoagulation in an  
15  
16 unselected population with embolic stroke of undetermined source<sup>26</sup>. This highlights the  
17  
18 heterogeneity of the pathophysiological mechanisms that lead to cryptogenic stroke. There is  
19  
20 an unmet clinical need to develop risk markers that identify the subset of patients with  
21  
22 cryptogenic stroke that occur as a result of cardio-embolism.  
23  
24  
25

26  
27 Studies have previously described serological and echocardiographic markers associated with  
28  
29 the recurrence of cryptogenic stroke<sup>27</sup>. Similarly, excessive PACs are readily assessed and  
30  
31 may serve as a novel and reproducible marker to identify patients at high risk for the  
32  
33 cryptogenic stroke. It is unclear if excessive PACs directly promote thrombogenesis or if they  
34  
35 are simply a marker of adverse atrial remodelling that leads to thrombogenesis and stroke.  
36  
37  
38 Regardless, the risk conferred by an elevated CHA<sub>2</sub>DS<sub>2</sub>VASc score in conjunction with  
39  
40 excessive PACs for ischaemic stroke remains significant<sup>9</sup>.  
41  
42  
43

44 This study has limitations. The absence of prolonged monitoring with devices such as  
45  
46 implantable loop recorders could have led to an underestimation of incident AF. However,  
47  
48 we excluded all patients with a diagnosis of AF over 1.9 years of mean follow up. A higher  
49  
50 number of cryptogenic stroke patients were present in our population than previously  
51  
52 reported. This is likely due to referral bias, as patients were only included if they underwent  
53  
54 Holter monitoring. However, the higher prevalence of cryptogenic stroke improves the  
55  
56 strength of our findings in this specific subset of stroke patients.  
57  
58  
59  
60

## Conclusions

Excessive PACs are significantly associated with cryptogenic stroke. Vascular risk factors, increasing age and hypertension, were independently associated with excessive PACs. The utility of novel and reproducible cardiac markers to guide preventative strategies in cryptogenic stroke warrant further evaluation.

## Acknowledgements

None.

## Sources of funding

This research received no specific project grant from any funding agency in the public, commercial or not-for-profit sectors. Andrew W. Teh is the recipient of an Early Career Fellowship from the National Health and Medical Research Council of Australia (NHMRC). Jithin K. Sajeev is the recipient of an Australian Government Research Training Program Scholarship. Anoop N. Koshy is the recipient of a Postgraduate Research Scholarships from the NHMRC, National Heart Foundation of Australia and The Royal Australasian College of Physicians CRB Blackburn Scholarship. Jonathan M. Kalman is supported by a Practitioner Fellowship from the NHMRC.

## Competing interests

None.

## References

1. Royal College of Physicians Sentinel Stroke National Audit Programme (SSNAP). National clinical audit annual results portfolio March 2016-April 2017 2017 [Available from: <http://bit.ly/1NHylqH> accessed 24 December 2018].
2. Hart RG, Diener HC, Coutts SB, et al. Embolic strokes of undetermined source: the case for a new clinical construct. *Lancet Neurol* 2014;13(4):429-38. doi: 10.1016/S1474-4422(13)70310-7
3. Gladstone DJ, Spring M, Dorian P, et al. Atrial fibrillation in patients with cryptogenic stroke. *N Engl J Med* 2014;370(26):2467-77. doi: 10.1056/NEJMoa1311376 [published Online First: 2014/06/26]
4. Ntaios G, Papavasileiou V, Milionis H, et al. Embolic strokes of undetermined source in the Athens stroke registry: a descriptive analysis. *Stroke* 2015;46(1):176-81. doi: 10.1161/STROKEAHA.114.007240
5. Liao J, Khalid Z, Scallan C, et al. Noninvasive cardiac monitoring for detecting paroxysmal atrial fibrillation or flutter after acute ischemic stroke: a systematic review. *Stroke* 2007;38(11):2935-40. doi: 10.1161/STROKEAHA.106.478685
6. Brachmann J, Morillo CA, Sanna T, et al. Uncovering Atrial Fibrillation Beyond Short-Term Monitoring in Cryptogenic Stroke Patients: Three-Year Results From the Cryptogenic Stroke and Underlying Atrial Fibrillation Trial. *Circ Arrhythm Electrophysiol* 2016;9(1):e003333. doi: 10.1161/CIRCEP.115.003333 [published Online First: 2016/01/15]

- 1  
2  
3 7. Conen D, Adam M, Roche F, et al. Premature atrial contractions in the general population:  
4  
5 frequency and risk factors. *Circulation* 2012;126(19):2302-8. doi:  
6  
7 10.1161/CIRCULATIONAHA.112.112300 [published Online First: 2012/10/11]  
8  
9
- 10 8. Healey JS, Connolly SJ, Gold MR, et al. Subclinical atrial fibrillation and the risk of  
11  
12 stroke. *N Engl J Med* 2012;366(2):120-9. doi: 10.1056/NEJMoa1105575  
13  
14
- 15 9. Larsen BS, Kumarathurai P, Falkenberg J, et al. Excessive Atrial Ectopy and Short Atrial  
16  
17 Runs Increase the Risk of Stroke Beyond Incident Atrial Fibrillation. *J Am Coll*  
18  
19 *Cardiol* 2015;66(3):232-41. doi: 10.1016/j.jacc.2015.05.018 [published Online First:  
20  
21 2015/07/18]  
22  
23
- 24 10. Marinheiro R, Parreira L, Amador P, et al. Excessive atrial ectopic activity as an  
25  
26 independent risk factor for ischemic stroke. *Int J Cardiol* 2017;249:226-30. doi:  
27  
28 10.1016/j.ijcard.2017.08.054  
29  
30
- 31 11. Tereshchenko LG, Shah AJ, Li Y, et al. Electrocardiographic deep terminal negativity of  
32  
33 the P wave in V1 and risk of mortality: the National Health and Nutrition  
34  
35 Examination Survey III. *J Cardiovasc Electrophysiol* 2014;25(11):1242-8. doi:  
36  
37 10.1111/jce.12453  
38  
39
- 40 12. Adams HP, Jr., Bendixen BH, Kappelle LJ, et al. Classification of subtype of acute  
41  
42 ischemic stroke. Definitions for use in a multicenter clinical trial. TOAST. Trial of  
43  
44 Org 10172 in Acute Stroke Treatment. *Stroke* 1993;24(1):35-41.  
45  
46
- 47 13. Clinical guidelines for stroke management 2010. *National Stroke Foundation Melbourne*  
48  
49 *Australia* 2010  
50  
51
- 52 14. Todo K, Moriwaki H, Saito K, et al. Frequent premature atrial contractions in stroke of  
53  
54 undetermined etiology. *Eur Neurol* 2009;61(5):285-8. doi: 10.1159/000206853  
55  
56
- 57 15. Engstrom G, Hedblad B, Juul-Moller S, et al. Cardiac arrhythmias and stroke: increased  
58  
59 risk in men with high frequency of atrial ectopic beats. *Stroke* 2000;31(12):2925-9.  
60



- 1  
2  
3 16. Acharya T, Tringali S, Bhullar M, et al. Frequent Atrial Premature Complexes and Their  
4  
5 Association With Risk of Atrial Fibrillation. *Am J Cardiol* 2015;116(12):1852-7. doi:  
6  
7 10.1016/j.amjcard.2015.09.025 [published Online First: 2015/11/28]  
8  
9  
10 17. Murakoshi N, Xu D, Sairenchi T, et al. Prognostic impact of supraventricular premature  
11  
12 complexes in community-based health checkups: the Ibaraki Prefectural Health Study.  
13  
14 *Eur Heart J* 2015;36(3):170-8. doi: 10.1093/eurheartj/ehu407 [published Online First:  
15  
16 2014/11/02]  
17  
18  
19 18. Binici Z, Intzilakis T, Nielsen OW, et al. Excessive supraventricular ectopic activity and  
20  
21 increased risk of atrial fibrillation and stroke. *Circulation* 2010;121(17):1904-11. doi:  
22  
23 10.1161/CIRCULATIONAHA.109.874982  
24  
25  
26 19. Pinho J, Braga CG, Rocha S, et al. Atrial ectopic activity in cryptogenic ischemic stroke  
27  
28 and TIA: a risk factor for recurrence. *J Stroke Cerebrovasc Dis* 2015;24(2):507-10.  
29  
30 doi: 10.1016/j.jstrokecerebrovasdis.2014.09.029  
31  
32  
33 20. Kamel H, Elkind MS, Bhave PD, et al. Paroxysmal supraventricular tachycardia and the  
34  
35 risk of ischemic stroke. *Stroke* 2013;44(6):1550-4. doi:  
36  
37 10.1161/STROKEAHA.113.001118 [published Online First: 2013/05/02]  
38  
39  
40 21. Kistler PM, Sanders P, Fynn SP, et al. Electrophysiologic and electroanatomic changes in  
41  
42 the human atrium associated with age. *J Am Coll Cardiol* 2004;44(1):109-16. doi:  
43  
44 10.1016/j.jacc.2004.03.044  
45  
46  
47 22. Medi C, Kalman JM, Spence SJ, et al. Atrial electrical and structural changes associated  
48  
49 with longstanding hypertension in humans: implications for the substrate for atrial  
50  
51 fibrillation. *J Cardiovasc Electrophysiol* 2011;22(12):1317-24. doi: 10.1111/j.1540-  
52  
53 8167.2011.02125.x  
54  
55  
56 23. Oakes RS, Badger TJ, Kholmovski EG, et al. Detection and quantification of left atrial  
57  
58 structural remodeling with delayed-enhancement magnetic resonance imaging in  
59  
60

1  
2  
3 patients with atrial fibrillation. *Circulation* 2009;119(13):1758-67. doi:

4  
5 10.1161/CIRCULATIONAHA.108.811877  
6  
7

8 24. Diez J. Mechanisms of cardiac fibrosis in hypertension. *J Clin Hypertens (Greenwich)*  
9  
10 2007;9(7):546-50.  
11

12 25. Perticone F, Ceravolo R, Pujia A, et al. Prognostic significance of endothelial dysfunction  
13  
14 in hypertensive patients. *Circulation* 2001;104(2):191-6.  
15  
16

17 26. Hart RG, Sharma M, Mundl H, et al. Rivaroxaban for Stroke Prevention after Embolic  
18  
19 Stroke of Undetermined Source. *N Engl J Med* 2018;378(23):2191-201. doi:  
20  
21 10.1056/NEJMoa1802686 [published Online First: 2018/05/17]  
22  
23

24 27. Yaghi S, Moon YP, Mora-McLaughlin C, et al. Left atrial enlargement and stroke  
25  
26 recurrence: the Northern Manhattan Stroke Study. *Stroke* 2015;46(6):1488-93. doi:  
27  
28 10.1161/STROKEAHA.115.008711  
29  
30  
31  
32  
33  
34  
35  
36  
37  
38  
39  
40  
41  
42  
43  
44  
45  
46  
47  
48  
49  
50  
51  
52  
53  
54  
55  
56  
57  
58  
59  
60

1  
2  
3 **Figure Legend**  
4

5  
6 **Figure 1.**  
7

8  
9 Patient selection: inclusions and exclusions.

10  
11 AF = atrial fibrillation; CABG = coronary artery bypass grafting; COPD = chronic  
12 obstructive pulmonary disease; TIA = transient ischaemic attack;  
13  
14  
15

16  
17 **Figure 2.**  
18

19  
20 Median PACs by CHA<sub>2</sub>DS<sub>2</sub>VASc score for control and stroke/TIA groups.  
21

22  
23 CHA<sub>2</sub>DS<sub>2</sub>VASc = risk score for ischaemic stroke; TIA = transient ischaemic attack;  
24  
25  
26  
27  
28  
29  
30  
31  
32  
33  
34  
35  
36  
37  
38  
39  
40  
41  
42  
43  
44  
45  
46  
47  
48  
49  
50  
51  
52  
53  
54  
55  
56  
57  
58  
59  
60

## Tables

**Table 1.** Baseline characteristics of study participants.

| <b>Characteristics</b>                  | <b>Control</b><br>n = 251<br>n (%) | <b>Stroke/TIA</b><br>n = 461<br>n (%) | <b>P value</b> |
|-----------------------------------------|------------------------------------|---------------------------------------|----------------|
| Age, y (SD)                             | 70.5 (11.6)                        | 69.8 (12.5)                           | 0.45           |
| Sex, Female                             | 88 (35.1)                          | 195 (42.3)                            | 0.06           |
| <b>Stroke Subtypes</b>                  |                                    |                                       |                |
| Large vessel<br>atherosclerosis         | -                                  | 82 (17.8)                             | -              |
| Small vessel occlusion                  | -                                  | 86 (18.7)                             | -              |
| Cryptogenic                             | -                                  | 291(63.1)                             | -              |
| Stroke of other determined<br>aetiology | -                                  | 2 (0.4)                               | -              |
| <b>Vascular Risk Factors</b>            |                                    |                                       |                |
| Hypertension                            | 130 (51.8)                         | 294 (63.8)                            | 0.01           |
| Dyslipidaemia                           | 91 (36.3)                          | 209 (45.3)                            | 0.02           |
| Diabetes Mellitus                       | 38 (15.1)                          | 113 (24.5)                            | 0.01           |
| Any Smoking                             | 44 (17.5)                          | 118 (25.6)                            | 0.01           |
| Previous Stroke/TIA                     | 0 (0)                              | 79 (17.1)                             | <0.001         |
| Myocardial Infarction                   | 40 (15.9)                          | 82 (17.8)                             | 0.53           |
| Peripheral Vascular<br>Disease          | 5 (2.0)                            | 26 (5.6)                              | 0.02           |
| Sleep Apnoea                            | 14 (5.6)                           | 13 (2.8)                              | 0.07           |

|                                                             |               |               |        |
|-------------------------------------------------------------|---------------|---------------|--------|
| History of Heart Failure                                    | 11 (4.4)      | 25 (5.4)      | 0.55   |
| CHA <sub>2</sub> DS <sub>2</sub> VASc score<br>median (IQR) | 2 (1 – 3)     | 5 (4 – 5)     | <0.001 |
| <b>Medications</b>                                          |               |               |        |
| Warfarin                                                    | 4 (1.6)       | 4 (0.9)       | 0.38   |
| Direct Oral<br>Anticoagulant                                | 4 (1.6)       | 1 (0.2)       | -      |
| Antiplatelet Therapy                                        | 81 (32.3)     | 165 (35.8)    | 0.35   |
| Beta blocker                                                | 48 (19.1)     | 82 (17.8)     | 0.66   |
| Ace Inhibitor                                               | 105 (41.8)    | 224 (48.6)    | 0.08   |
| Statin                                                      | 79 (31.5)     | 187 (40.6)    | 0.02   |
| <b>Premature Atrial Complexes</b>                           |               |               |        |
| PACs/24 hours<br>median (IQR)                               | 37 (13 - 115) | 62 (20 - 208) | <0.01  |
| Longest atrial run<br>median (IQR)                          | 3 (0 – 7)     | 3 (0 – 8)     | <0.01  |
| Atrial runs >3 beats<br>median (IQR)                        | 1 (0 – 2)     | 1 (0 – 4)     | 0.07   |
| ≥ 200 PACs/24 hours                                         | 37 (14.7)     | 118 (25.6)    | <0.001 |
| ≥20 beats in runs                                           | 13 (5.2)      | 27 (5.9)      | 0.71   |

SD = standard deviation; TIA = transient ischaemic attack; IQR = interquartile range; PAC = premature atrial complexes; The data is presented as n (%), unless otherwise stated.

**Table 2.** Multivariate analysis: risk factors associated with Stroke/TIA and cryptogenic stroke.

| Characteristic | Stroke/TIA          |         | Cryptogenic Stroke  |         |
|----------------|---------------------|---------|---------------------|---------|
|                | Odds Ratio (95% CI) | P value | Odds Ratio (95% CI) | P value |
| Female         | 1.51 (1.09 - 2.11)  | <0.05   | 1.78 (1.19 – 2.67)  | <0.01   |
| Hypertension   | 1.53 (1.07 - 2.17)  | <0.05   | 1.67 (1.05 – 2.64)  | <0.05   |
| Smoking        | 1.58 (1.06 - 2.36)  | <0.05   | 1.55 (0.95 – 2.53)  | 0.08    |
| ≥200 PACs      | 1.97 (1.29 - 3.02)  | <0.01   | 1.95 (1.16 – 3.28)  | <0.05   |

CI = confidence interval; PAC = premature atrial complexes.

*Variables adjusted in the multivariate model: Age, sex, excessive premature atrial complexes, hypertension, diabetes mellitus, smoking, dyslipidaemia, peripheral vascular disease and sleep apnoea*

**Table 3.** Multivariate analysis: Vascular risk factors predictive of excessive PACs in all patients.

| Risk factor       | Odds Ratio (95% CI) | P value |
|-------------------|---------------------|---------|
| Age               |                     |         |
| 65 – 74           | 2.52 (1.42 - 4.45)  | <0.01   |
| ≥ 75              | 3.64 (2.08 - 6.36)  | <0.01   |
| Hypertension      | 1.54 (1.01 - 2.34)  | <0.05   |
| Diabetes Mellitus | 1.41 (0.91 - 2.20)  | 0.13    |

CI = confidence interval.

*Variables adjusted in the multivariate model: Age: <65, 65-74, ≥75, gender, hypertension, diabetes mellitus, smoking, dyslipidaemia, peripheral vascular disease, sleep apnoea.*

### Author Statement

JS led and designed the study, collated and analysed data and wrote the manuscript. AK collated and analysed the data and revised the manuscript. HD contributed to study design and revised the manuscript. JK contributed to study design and revised the manuscript. KR collated and analysed the data and revised the manuscript. MT collated and analysed the data and revised the manuscript. MS analysed the data and revised the manuscript. LR contributed to study design and revised the manuscript. JC contributed to study design and revised the manuscript. MW contributed to study design and revised the manuscript. TF collated and analysed the data and revised the manuscript. AT supervised and designed the study revised the manuscript. All authors read and approved the final manuscript.



1  
2  
3  
4  
5  
6  
7  
8  
9  
10  
11  
12  
13  
14  
15  
16  
17  
18  
19  
20  
21  
22  
23  
24  
25  
26  
27  
28  
29  
30  
31  
32  
33  
34  
35  
36  
37  
38  
39  
40  
41  
42  
43  
44  
45  
46  
47  
48  
49  
50  
51  
52  
53  
54  
55  
56  
57  
58  
59  
60

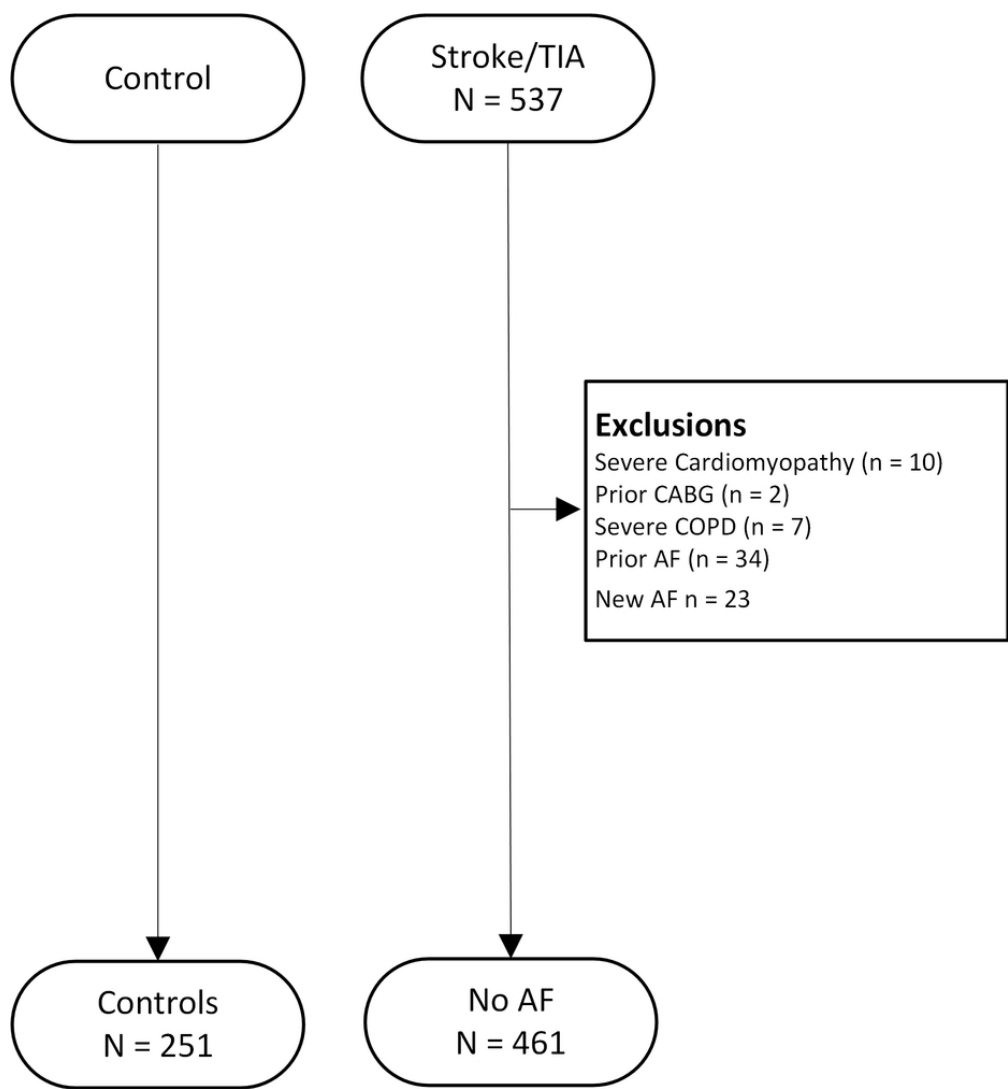

Patient selection: inclusions and exclusions.  
AF = atrial fibrillation; CABG = coronary artery bypass grafting; COPD = chronic obstructive pulmonary disease; TIA = transient ischaemic attack;

78x84mm (300 x 300 DPI)

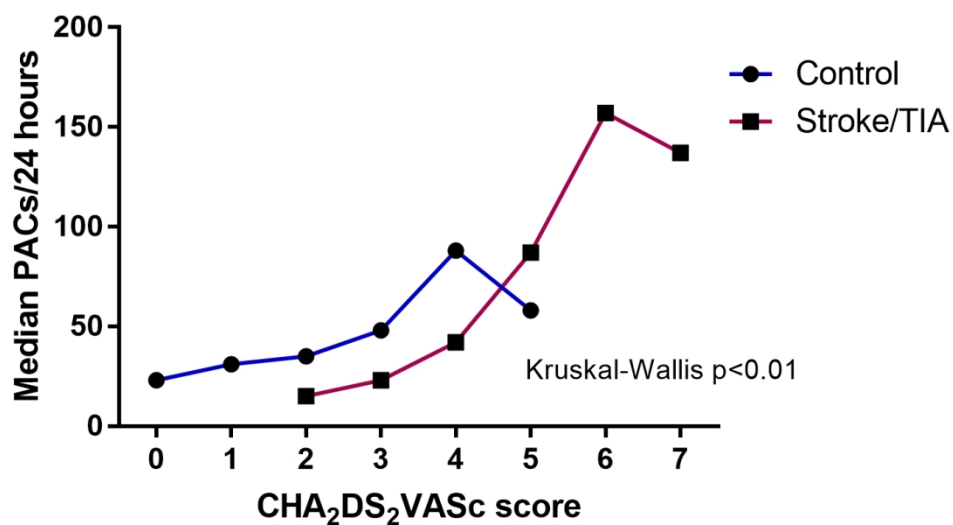

Median PACs by CHA<sub>2</sub>DS<sub>2</sub>VASc score for control and stroke/TIA groups.  
CHA<sub>2</sub>DS<sub>2</sub>VASc = risk score for ischaemic stroke; TIA = transient ischaemic attack;

127x74mm (300 x 300 DPI)

# BMJ Open

## The association between excessive premature atrial complexes and cryptogenic stroke: results of a case – control study.

|                                 |                                                                                                                                                                                                                                                                                                                                                                                                                                                                                                                                                                                                                                                                                                                                                                                                                                                                                                                                                                                                                                                                                                                                            |
|---------------------------------|--------------------------------------------------------------------------------------------------------------------------------------------------------------------------------------------------------------------------------------------------------------------------------------------------------------------------------------------------------------------------------------------------------------------------------------------------------------------------------------------------------------------------------------------------------------------------------------------------------------------------------------------------------------------------------------------------------------------------------------------------------------------------------------------------------------------------------------------------------------------------------------------------------------------------------------------------------------------------------------------------------------------------------------------------------------------------------------------------------------------------------------------|
| Journal:                        | <i>BMJ Open</i>                                                                                                                                                                                                                                                                                                                                                                                                                                                                                                                                                                                                                                                                                                                                                                                                                                                                                                                                                                                                                                                                                                                            |
| Manuscript ID                   | bmjopen-2019-029164.R1                                                                                                                                                                                                                                                                                                                                                                                                                                                                                                                                                                                                                                                                                                                                                                                                                                                                                                                                                                                                                                                                                                                     |
| Article Type:                   | Research                                                                                                                                                                                                                                                                                                                                                                                                                                                                                                                                                                                                                                                                                                                                                                                                                                                                                                                                                                                                                                                                                                                                   |
| Date Submitted by the Author:   | 14-Mar-2019                                                                                                                                                                                                                                                                                                                                                                                                                                                                                                                                                                                                                                                                                                                                                                                                                                                                                                                                                                                                                                                                                                                                |
| Complete List of Authors:       | Sajeev, Jithin; Monash University Eastern Health Clinical School, ; Eastern Health, Department of Cardiology<br>Koshy, Anoop; Monash University Eastern Health Clinical School; Monash University Eastern Health Clinical School<br>Dewey, Helen; Eastern Health, Neurosciences; Monash University Eastern Health Clinical School<br>Kalman, Jonathan; Royal Melbourne Hospital,<br>Rajakariar, Kevin; Eastern Health, Department of Cardiology<br>Tan, Mae; Eastern Health, Department of Cardiology<br>Street, Maryann; Deakin University, School of Nursing and Midwifery; Eastern Health, Eastern Health - Deakin University Nursing and Midwifery research Centre<br>Roberts, Louise; Monash University Eastern Health Clinical School; Eastern Health, Department of Cardiology<br>Cooke, Jennifer; Eastern Health, Department of Cardiology; Monash University Eastern Health Clinical School<br>Wong, Michael; Eastern Health, Department of Cardiology<br>Frost, Tanya; Eastern Health, Department of Neurosciences<br>Teh, Andrew W.; Monash University Eastern Health Clinical School; Eastern Health, Department of Cardiology |
| <b>Primary Subject Heading</b>: | Cardiovascular medicine                                                                                                                                                                                                                                                                                                                                                                                                                                                                                                                                                                                                                                                                                                                                                                                                                                                                                                                                                                                                                                                                                                                    |
| Secondary Subject Heading:      | Neurology                                                                                                                                                                                                                                                                                                                                                                                                                                                                                                                                                                                                                                                                                                                                                                                                                                                                                                                                                                                                                                                                                                                                  |
| Keywords:                       | Pacing & electrophysiology < CARDIOLOGY, Stroke medicine < INTERNAL MEDICINE, Cardiology < INTERNAL MEDICINE                                                                                                                                                                                                                                                                                                                                                                                                                                                                                                                                                                                                                                                                                                                                                                                                                                                                                                                                                                                                                               |
|                                 |                                                                                                                                                                                                                                                                                                                                                                                                                                                                                                                                                                                                                                                                                                                                                                                                                                                                                                                                                                                                                                                                                                                                            |

SCHOLARONE™  
Manuscripts

1  
2  
3 **The association between excessive premature atrial complexes and cryptogenic stroke:**  
4  
5 **results of a case – control study.**  
6  
7

8 Jithin K. Sajeev, MBChB<sup>1,2</sup>, Anoop N. Koshy, MBBS<sup>1</sup>, Helen Dewey, MBBS, PhD<sup>1,3</sup>,  
9  
10 Jonathan M. Kalman, MBBS, PhD<sup>5</sup>, Kevin Rajakariar, MBBS<sup>2</sup>, Mae C. Tan, MBBS<sup>2</sup>,  
11  
12 Maryann Street, PhD<sup>4</sup>, Louise Roberts, PhD<sup>1,2</sup>, Jennifer C. Cooke, MBBS<sup>1,2</sup>, Michael C.  
13  
14 Wong, MBBS, PhD<sup>2</sup>, Tanya Frost, RN<sup>3</sup>, Andrew W. Teh, MBBS, PhD<sup>1,2</sup>  
15  
16  
17

18 **Affiliations**  
19

20  
21 <sup>1</sup>Eastern Health Clinical School, Monash University, Victoria, Australia  
22

23  
24 <sup>2</sup>Department of Cardiology, Eastern Health, Victoria, Australia  
25

26  
27 <sup>3</sup>Department of Neuroscience, Eastern Health, Victoria, Australia  
28

29  
30 <sup>4</sup>School of Nursing and Midwifery, Deakin University, Victoria, Australia  
31

32  
33 <sup>5</sup>Department of Cardiology, The Royal Melbourne Hospital, Victoria, Australia  
34  
35

36 **Corresponding Author:**  
37

38  
39 A/Prof. Andrew W Teh  
40

41  
42 Department of Cardiology, Box Hill Hospital,  
43

44  
45 Level 2, Building B, 8 Arnold Street, Box Hill,  
46

47  
48 VIC 3128, Australia  
49

50  
51 Phone: +61 3 9895 4833  
52

53  
54 Email: andrew.teh@easternhealth.org.au  
55  
56  
57  
58  
59

60 **Word Count: 2370**

## Abstract

**Objective:** Recent anticoagulation trials in all-comer cryptogenic stroke patients have yielded equivocal results, reinvigorating the focus on identifying reproducible markers of an atrial myopathy. We investigated the role of excessive premature atrial complexes (PACs) in ischaemic stroke, including cryptogenic stroke and its association with vascular risk factors.

**Methods and Results:** A case control study was conducted utilising a multi-centre institutional stroke database to compare 461 patients with an ischaemic stroke or transient ischaemic attack (TIA) with a control group consisting of age matched patients without prior history of ischaemic stroke/TIA. All patients underwent 24-hour Holter monitoring during the study period and atrial fibrillation was excluded.

An excessive PAC burden, defined as  $\geq 200$  PACs/24 hours, was present in 25.6% and 14.7% ( $p < 0.01$ ), of stroke/TIA and control patients respectively. On multivariate regression, excessive PACs (OR 1.97; 95% confidence interval (CI): 1.29 – 3.02;  $p < 0.01$ ), smoking (OR 1.58; CI: 1.06 – 2.36;  $p < 0.05$ ) and hypertension (OR 1.53; CI: 1.07 – 2.17;  $p < 0.05$ ) were independently associated with ischaemic stroke/TIA. Excessive PACs remained the strongest independent risk factor for the cryptogenic stroke subtype (OR 1.95; CI: 1.16 – 3.28;  $p < 0.05$ ). Vascular risk factors that promote atrial remodelling, increasing age ( $\geq 75$  years OR 3.64; CI: 2.08 – 6.36;  $p < 0.01$ ) and hypertension (OR 1.54; CI: 1.01 – 2.34;  $p < 0.05$ ) were independently associated with excessive PACs.

**Conclusions:** Excessive PACs are independently associated with cryptogenic stroke and may be a reproducible marker of atrial myopathy. Prospective studies assessing their utility in guiding stroke prevention strategies may be warranted.

**Keywords:** Stroke; Atrial premature complexes; Cryptogenic stroke; Embolic stroke of undetermined source.

### Strength and limitations of this study

- This study employed a case control design to compare the burden of premature atrial complexes in ischaemic stroke, including the cryptogenic stroke subtype and an age matched control group.
- All patients underwent 24 hours of ambulatory Holter monitoring to exclude atrial fibrillation and to document the burden of premature atrial complexes.
- This study describes the association between vascular risk factors and premature atrial complexes and used multivariate analysis to reduce confounding.
- The study is limited by its cross-sectional, case control design and causality cannot be inferred from the associations.

## Introduction

Approximately 100,000 strokes occur every year in the United Kingdom, with 1 in 4 survivors experiencing another stroke<sup>1</sup>. While 87% of all strokes are ischaemic in nature, 25% - 35% of these are labelled cryptogenic, as a clear cause is not identified.<sup>2,3</sup> Subclinical paroxysmal AF is postulated to be the cause for a significant proportion of these cryptogenic strokes.<sup>4,5</sup> However, despite prolonged rhythm monitoring, occult AF occur in only a small proportion of patients.<sup>6,7</sup>

With the recent equivocal results of randomised controlled anticoagulation trials in all-comer patients with embolic stroke of undetermined source, there has been a heightened focus in identifying reproducible markers of an atrial myopathy<sup>8</sup>. Premature atrial complexes have been thought to be a benign phenomenon with a prevalence in the general population that ranges from 6% - 29%.<sup>9</sup> A limited number of studies have shown a significant association between excessive PACs and ischaemic stroke, suggesting their relevance as a marker of atrial myopathy.<sup>10-14</sup> While another study has shown an elevated risk for recurrent stroke in patients with excessive PACs, following a cryptogenic stroke<sup>15</sup>. However, these have not delineated whether baseline excessive PACs confer an increased risk for the cryptogenic stroke subtype. In addition, it is unclear whether vascular risk factors that promote stroke, independently and uniformly lead to atrial remodelling that result in excessive PAC burden. We sought to determine the association between excessive PACs and ischaemic stroke, including the cryptogenic stroke subtype and their relationship to conventional risk factors.

## Methods

A multicentre case-control study was conducted among consecutive patients who presented with an ischaemic stroke or TIA between May 2011 and December 2015. Patients within the stroke/TIA group were identified through a prospectively maintained institutional stroke

1  
2  
3 database that covered three tertiary, university hospitals. Stroke subtypes were determined  
4  
5 according to the Trial of Org 10172 in Acute Stroke Treatment (TOAST) classification<sup>16</sup>.  
6  
7

8  
9 Inclusion criteria were: 1) age  $\geq 18$  years; 2) adjudicated to have had an ischaemic stroke/TIA  
10  
11 by the stroke service and 3) underwent 24-hour Holter monitoring following their index  
12  
13 stroke/TIA. Exclusion criteria were: 1) history of atrial fibrillation, atrial flutter or a  
14  
15 subsequent diagnosis of these arrhythmias on inpatient telemetry, Holter monitoring or during  
16  
17 follow up; 2) underlying severe cardiomyopathy with an ejection fraction  $< 35\%$ ; 3) previous  
18  
19 coronary artery bypass grafting; 4) recent myocardial infarction or 5) severe chronic  
20  
21 obstructive airways disease.  
22  
23

24  
25 Eligible patients were compared to a group of age-matched controls, without prior history of  
26  
27 stroke or AF and underwent outpatient Holter monitoring. The control group were composed  
28  
29 of patients that underwent investigation of chest pain, syncope, pre-syncope and palpitations.  
30  
31 The stroke/TIA and control groups were age matched with the same exclusion criteria  
32  
33 applied.  
34  
35

### 36 37 *Clinical assessment and outcome measures*

38  
39  
40 All included patients adjudicated as having a stroke/TIA underwent investigation and  
41  
42 treatment as per the national stroke guidelines recommendation for standard of care.<sup>17</sup> This  
43  
44 included physical examination, blood measurements, 12 lead ECG, pulse oximetry, computed  
45  
46 tomography of the brain (CTB), inpatient cardiac monitoring and vascular assessment. All  
47  
48 patients underwent Holter monitoring with 24 hours of continuous rhythm capture utilising  
49  
50 the SEER Light Holter Monitor (GE Healthcare, Milwaukee, USA). Data were analysed  
51  
52 offline upon completion of the monitoring period by cardiac technicians and subsequently  
53  
54 reviewed by a cardiac electrophysiologist blinded to the study hypothesis. Rhythm analysis  
55  
56  
57  
58  
59  
60



1  
2  
3 was conducted using MARS Ambulatory ECG Analysis System (GE Healthcare, Milwaukee,  
4 USA).  
5  
6

7  
8 Baseline demographic and clinical data were collected from electronic health records along  
9 with vascular risk factors to allow for calculation of a CHA<sub>2</sub>DS<sub>2</sub>VASc score, medication use  
10 and to identify presentations with recurrent stroke or TIA. Based on prior literature, we  
11 defined excessive PAC burden as  $\geq 200$  PACs/24 hours and a long atrial run as  $\geq 20$  beats.<sup>10 18</sup>  
12  
13  
14

15  
16  
17  
18  
19  
20  
21

### *Statistical methods*

22  
23 Demographic data, disease status and outcome measures are presented as proportions and  
24 summarised by descriptive statistics. Data were tested for normality and parametric or non-  
25 parametric tests applied as appropriate. Correlation trends were analysed using Spearman's  
26 rho for non-parametric data. A p-value  $< 0.05$  was deemed statistically significant and a 95%  
27 confidence interval (CI) is presented where applicable. Markers associated with stroke/TIA  
28 and excessive PACs were identified by univariate and multivariate logistical regression. Any  
29 variable with a p value  $< 0.25$  on univariate analysis was included in multivariate analyses.  
30  
31  
32

33 All statistical analysis was performed with SPSS Statistics 24.0 (IBM, USA).  
34  
35  
36  
37  
38  
39

### *Patient and public involvement*

40  
41  
42  
43 Public involvement was sought after the methods and outcome measures were identified. The  
44 protocol and study design were reviewed by human research ethics committee, 45% of whom  
45 were members of the public.  
46  
47  
48  
49  
50  
51

### *Ethics approval and data sharing*

52  
53  
54 The research protocol was approved by the institutional Human Research Ethics Committee  
55 and written informed consent was not deemed necessary by the committee (approval number:  
56  
57  
58  
59  
60

1  
2  
3 LR09/2016). The raw data will be made available by the corresponding author upon  
4  
5 reasonable request.  
6  
7

## 8 **Results**

9

10  
11 In total, 537 patients presented with a stroke/TIA during the study inclusion period and  
12  
13 underwent Holter monitoring. 23 out of 537 (4.2%) patients had AF identified on Holter  
14  
15 monitoring and were excluded. Four patients with AF had an excessive PAC burden (17%).  
16  
17

18  
19 Following exclusions, 461 patients with a stroke/TIA were compared against 251 age-  
20  
21 matched patients that underwent Holter monitoring during the same time period (Figure 1).  
22  
23

24 The median time to Holter monitoring following the stroke or TIA was 40 days.  
25  
26

### 27 *Ischaemic stroke and PAC burden*

28  
29

30 Baseline characteristics stratified according to study groups are shown in Table 1. In both  
31  
32 groups, the mean age was 70 years and the majority of patients were male. Stroke/TIA  
33  
34 patients were significantly more likely to have comorbidities of hypertension, diabetes  
35  
36 mellitus, dyslipidaemia, peripheral vascular disease and a prior history of smoking. There  
37  
38 were 79 patients with a prior cerebrovascular event in the stroke/TIA group. On admission,  
39  
40 there was significantly higher use of statins in the stroke/TIA cohort, however no difference  
41  
42 was evident in the use of antiplatelet therapy or oral anticoagulants. The prevalence of  
43  
44 excessive PACs were significantly higher in the stroke/TIA group (25.6% vs 14.7%,  $p =$   
45  
46 0.001), however atrial runs of  $\geq 20$  beats were not significantly different (Table 1).  
47  
48  
49

50  
51 Multivariate analysis showed female sex, hypertension, history of smoking and excessive  
52  
53 PACs were significantly associated with a stroke/TIA. Excessive PACs conferred the highest  
54  
55 risk for stroke/TIA with an odds ratio of 1.97(CI: 1.29 – 3.02), but the difference was not  
56  
57 significant when compared with other risk factors associated with stroke/TIA (Table 2).  
58  
59  
60

1  
2  
3 Multivariate analysis with various definitions of excessive PACs based on prior literature  
4 yielded similar results, with a significant association between Excessive PACs and  
5 stroke/TIA (Supplementary file).  
6  
7  
8

9  
10 Analysis of PAC burden revealed a skewed distribution, median PACs/24 hours and longest  
11 atrial ectopic runs were significantly higher in the stroke/TIA group. However, number of  
12 beats in runs of greater than 3 beats was not significantly different between the 2 groups.  
13  
14  
15  
16

### 17 *Cryptogenic Stroke and PAC burden*

18  
19 One hundred and eighty-five patients with cryptogenic stroke, after excluding TIA, were  
20 compared with 251 patients in the control group. The mean age was not significantly  
21 different between the control and cryptogenic stroke group, 70.5 and 68.9 years respectively.  
22  
23 Cryptogenic stroke was significantly associated with excessive PAC burden, female sex,  
24 hypertension, diabetes mellitus, smoking, obstructive sleep apnoea and a higher median  
25 CHA<sub>2</sub>DS<sub>2</sub>VASc score on univariate analysis. Excessive PACs (OR: 1.95; CI: 1.16 – 3.28),  
26 female sex (OR: 1.78; CI: 1.19 – 2.67) and hypertension (OR: 1.67; CI: 1.05 – 2.64)  
27 maintained significant and independent associations with cryptogenic stroke subtype on  
28 multivariate logistical regression (Table 2).  
29  
30  
31  
32  
33  
34  
35  
36  
37  
38  
39  
40  
41  
42

### 43 *Vascular risk factors and PAC burden*

44  
45 Increasing CHA<sub>2</sub>DS<sub>2</sub>VASc score was associated with increasing median PACs in both groups  
46 (Figure 2). A CHA<sub>2</sub>DS<sub>2</sub>VASc score greater than 3 in the control group and 2 in the stroke/TIA  
47 group were associated with an excessive PAC burden. However, only a moderate to weak  
48 correlation was evident between increasing CHA<sub>2</sub>DS<sub>2</sub>VASc score and increasing PACs/24 hours in  
49 all patients ( $r_s = 0.32$ ,  $p < 0.001$ ), control patients ( $r_s = 0.24$ ,  $p < 0.001$ ) and stroke/TIA patients ( $r_s$   
50  $= 0.32$ ,  $p < 0.001$ ) respectively.  
51  
52  
53  
54  
55  
56  
57  
58  
59  
60

1  
2  
3 In all patients, age, hypertension, diabetes mellitus and peripheral vascular disease were significant  
4 univariate predictors of excessive PACs. However only age and hypertension remained  
5  
6 independently associated with excessive PACs on regression analysis, with age  $\geq 75$  being the  
7  
8 strongest marker associated with excessive PACs (Table 3).  
9  
10  
11  
12

### 13 **Discussion**

14  
15  
16 In this study, we compared the differences in PAC burden between patients with a stroke/TIA  
17  
18 and an age-matched control population, after excluding AF. Excessive PAC burden was  
19  
20 significantly more common in the stroke/TIA group. An important new finding in our study  
21  
22 was that excessive PACs demonstrated an independent association for the cryptogenic stroke  
23  
24 subtype, after adjusting for conventional risk factors (OR: 1.95; CI: 1.16 – 3.28). There was a  
25  
26 stepwise rise in PAC burden with increasing number of vascular risk factors; age and  
27  
28 hypertension were independent risk factors associated with excessive PACs.  
29  
30  
31  
32

33  
34 Investigators have previously demonstrated a significantly higher PAC burden in patients that  
35  
36 develop incident AF and ischemic stroke.<sup>18 20</sup> Existing longitudinal studies from Engstrom et  
37  
38 al. that demonstrated a high PAC burden conferred a 1.9 times higher risk for ischaemic  
39  
40 stroke.<sup>19</sup> Despite the differences in methodology, the current study showed 1.97 times rise in  
41  
42 odds for ischaemic stroke. Prior studies have also shown an association between runs of  
43  
44 PACs and ischaemic stroke in patients without documented AF<sup>21</sup>. The Copenhagen Holter  
45  
46 study, a cohort study that analysed the risk for stroke with an elevated PAC burden, defined  
47  
48 excessive supraventricular ectopic activity as a composite of either >30 PACs/hour or a run  
49  
50 of >20 PACs, and found a positive correlation with increased stroke and death.<sup>10 13</sup> In  
51  
52 contrast, we did not show a significant difference in PAC runs >20 beats between the two  
53  
54 groups.<sup>15</sup> This apparent discrepancy is likely due to a lack of standardised definitions for  
55  
56  
57  
58  
59  
60

1  
2  
3 excessive PACs and treating atrial premature runs  $\geq 20$  beats as a standalone variable in the  
4  
5 current study, instead of a composite measure.  
6  
7

8 The present study specifically analysed the association between excessive PACs and  
9  
10 cryptogenic stroke subtype. It demonstrated an independent association between cryptogenic  
11  
12 stroke subtype and excessive PACs with an odds ratio of 1.95. This is an important finding  
13  
14 and lends further support to the hypothesis, that excessive PACs may be the manifestation or  
15  
16 marker of underlying atrial myopathy, that confers an increased risk for cryptogenic stroke.  
17  
18

19 Further, similar to AF, the risk for ischaemic stroke in the presence of an excessive PAC  
20  
21 burden appear to be modulated by vascular risk factors. A CHA<sub>2</sub>DS<sub>2</sub>VASc score of 2  
22  
23 conferred a similar risk for ischaemic stroke in patients with excessive PACs, as with AF.<sup>10</sup>  
24  
25

26 An increasing CHA<sub>2</sub>DS<sub>2</sub>VASc score was significantly associated with increasing median  
27  
28 PAC burden in both the control and stroke/TIA group. However, despite the positive  
29  
30 correlation between CHA<sub>2</sub>DS<sub>2</sub>VASc score and premature atrial complexes, the strength of the  
31  
32 correlation itself remained weak. This was suggestive of differential effects of the various  
33  
34 components of CHA<sub>2</sub>DS<sub>2</sub>VASc score in contributing to a high PAC burden. The independent  
35  
36 contribution of the various risk markers that make up CHA<sub>2</sub>DS<sub>2</sub>VASc score have not been  
37  
38 assessed previously.<sup>10 13 22</sup> Delineation of these specific risk factors that contribute to  
39  
40 excessive PACs provides insights into the potential pathophysiological basis for excessive  
41  
42 PAC.  
43  
44  
45  
46  
47

48 Increasing age and hypertension were independently and significantly associated with  
49  
50 excessive PACs in the present study. This is consistent with electro-anatomical studies that  
51  
52 demonstrated slower conduction velocities and both global and regional reduction in atrial  
53  
54 voltages with increasing age and hypertension<sup>23 24</sup>. Such areas corresponded to delayed  
55  
56 enhancement on magnetic resonance imaging and histological fibrosis<sup>25,26</sup>. Thrombogenesis  
57  
58  
59  
60

1  
2  
3 associated with this underlying atrial remodelling may help explain a significant proportion  
4 of strokes currently classified as cryptogenic. Both advancing age and hypertension are also  
5 associated with small and large vessel stroke subtypes. In addition to atrial remodelling, it is  
6 likely that vascular risk factors promote thrombogenesis and ischaemic stroke through  
7 multiple pathways including arterial endothelial dysfunction, and atherosclerosis with  
8 localised plaque rupture.<sup>27</sup>  
9

10  
11 Our report of the independent association between excessive PACs and cryptogenic stroke  
12 further implicates a risk factor driven atrial substrate abnormality in its pathogenesis. These  
13 findings are clinically relevant as the results of a recently concluded large multicentre  
14 randomised controlled trial failed to demonstrate a benefit for oral anticoagulation in an  
15 unselected population with embolic stroke of undetermined source<sup>8</sup>. This highlights the  
16 heterogeneity of the pathophysiological mechanisms that lead to cryptogenic stroke. There is  
17 an unmet clinical need to develop risk markers that identify the subset of patients with  
18 cryptogenic stroke that occur as a result of cardio-embolism.  
19

20  
21 Studies have previously described serological and echocardiographic markers associated with  
22 the recurrence of cryptogenic stroke<sup>28</sup>. Similarly, excessive PACs are readily assessed and  
23 may serve as a novel and reproducible marker to identify patients at high risk for the  
24 cryptogenic stroke. It is unclear if excessive PACs directly promote thrombogenesis or if they  
25 are simply a marker of adverse atrial remodelling that leads to thrombogenesis and stroke.  
26  
27 Regardless, the risk conferred by an elevated CHA<sub>2</sub>DS<sub>2</sub>VASc score in conjunction with  
28 excessive PACs for ischaemic stroke remains significant<sup>10</sup>.  
29

30  
31 This study has limitations. The absence of prolonged monitoring with devices such as  
32 implantable loop recorders could have led to an underestimation of incident AF. However,  
33 we excluded all patients with a diagnosis of AF over 1.9 years of mean follow up. A higher  
34  
35  
36  
37  
38  
39  
40  
41  
42  
43  
44  
45  
46  
47  
48  
49  
50  
51  
52  
53  
54  
55  
56  
57  
58  
59  
60

1  
2  
3 number of cryptogenic stroke patients were present in our population than previously  
4 reported. This is likely due to referral bias, as patients were only included if they underwent  
5 Holter monitoring. All patients included in the study had guideline-based referral for Holter  
6 monitoring. However, as Holter monitoring was an inclusion criterion, we do not have data  
7 on patient who may have received their Holter monitoring at an external institution.  
8  
9 However, the higher prevalence of cryptogenic stroke improves the strength of our findings  
10 in this specific subset of stroke patients. The time to Holter monitoring following the stroke,  
11 based on routine institutional clinical waiting periods, could have introduced unintended  
12 variables such as neurologically mediated cardiac modelling with resultant excessive PACs  
13 and reverse causality. The higher burden of PACs was noted in a highly selective patient  
14 cohort with ischaemic stroke and a high burden of vascular risk factors. Despite the use of  
15 multivariate regression analysis, unrecognised confounders cannot be excluded in a cross-  
16 sectional case control study, therefore these findings should not be extrapolated to other  
17 patient cohorts.  
18  
19  
20  
21  
22  
23  
24  
25  
26  
27  
28  
29  
30  
31  
32  
33  
34  
35

### 36 **Conclusions**

37  
38 Excessive PACs are significantly associated with cryptogenic stroke. Vascular risk factors,  
39 increasing age and hypertension, were independently associated with excessive PACs. The  
40 utility of novel and reproducible cardiac markers to guide preventative strategies in  
41 cryptogenic stroke warrant further evaluation.  
42  
43  
44  
45  
46  
47  
48

### 49 **Acknowledgements**

50  
51 None.  
52  
53  
54

### 55 **Sources of funding**

56  
57 This research received no specific project grant from any funding agency in the public,  
58 commercial or not-for-profit sectors.  
59  
60

## Competing interests

None.

## Data Sharing

Data can be made available by contacting the corresponding author.

## References

1. Royal College of Physicians Sentinel Stroke National Audit Programme (SSNAP). National clinical audit annual results portfolio March 2016-April 2017 2017 [Available from: <http://bit.ly/1NHylqH> accessed 24 December 2018.
2. Hart RG, Diener HC, Coutts SB, et al. Embolic strokes of undetermined source: the case for a new clinical construct. *Lancet Neurol* 2014;13(4):429-38. doi: 10.1016/S1474-4422(13)70310-7
3. Benjamin EJ, Blaha MJ, Chiuve SE, et al. Heart Disease and Stroke Statistics-2017 Update: A Report From the American Heart Association. *Circulation* 2017;135(10):e146-e603. doi: 10.1161/CIR.0000000000000485 [published Online First: 2017/01/27]
4. Gladstone DJ, Spring M, Dorian P, et al. Atrial fibrillation in patients with cryptogenic stroke. *N Engl J Med* 2014;370(26):2467-77. doi: 10.1056/NEJMoa1311376 [published Online First: 2014/06/26]
5. Ntaios G, Papavasileiou V, Milionis H, et al. Embolic strokes of undetermined source in the Athens stroke registry: a descriptive analysis. *Stroke* 2015;46(1):176-81. doi: 10.1161/STROKEAHA.114.007240
6. Liao J, Khalid Z, Scallan C, et al. Noninvasive cardiac monitoring for detecting paroxysmal atrial fibrillation or flutter after acute ischemic stroke: a systematic review. *Stroke* 2007;38(11):2935-40. doi: 10.1161/STROKEAHA.106.478685



- 1  
2  
3 7. Brachmann J, Morillo CA, Sanna T, et al. Uncovering Atrial Fibrillation Beyond Short-  
4  
5 Term Monitoring in Cryptogenic Stroke Patients: Three-Year Results From the  
6  
7 Cryptogenic Stroke and Underlying Atrial Fibrillation Trial. *Circ Arrhythm*  
8  
9 *Electrophysiol* 2016;9(1):e003333. doi: 10.1161/CIRCEP.115.003333 [published  
10  
11 Online First: 2016/01/15]  
12  
13
- 14  
15 8. Hart RG, Sharma M, Mundl H, et al. Rivaroxaban for Stroke Prevention after Embolic  
16  
17 Stroke of Undetermined Source. *N Engl J Med* 2018;378(23):2191-201. doi:  
18  
19 10.1056/NEJMoa1802686 [published Online First: 2018/05/17]  
20  
21
- 22  
23 9. Conen D, Adam M, Roche F, et al. Premature atrial contractions in the general population:  
24  
25 frequency and risk factors. *Circulation* 2012;126(19):2302-8. doi:  
26  
27 10.1161/CIRCULATIONAHA.112.112300 [published Online First: 2012/10/11]  
28  
29
- 30  
31 10. Larsen BS, Kumarathurai P, Falkenberg J, et al. Excessive Atrial Ectopy and Short Atrial  
32  
33 Runs Increase the Risk of Stroke Beyond Incident Atrial Fibrillation. *J Am Coll*  
34  
35 *Cardiol* 2015;66(3):232-41. doi: 10.1016/j.jacc.2015.05.018 [published Online First:  
36  
37 2015/07/18]  
38  
39
- 40  
41 11. Marinheiro R, Parreira L, Amador P, et al. Excessive atrial ectopic activity as an  
42  
43 independent risk factor for ischemic stroke. *Int J Cardiol* 2017;249:226-30. doi:  
44  
45 10.1016/j.ijcard.2017.08.054  
46  
47
- 48  
49 12. Himmelreich JCL, Lucassen WAM, Heugten M, et al. Frequent premature atrial  
50  
51 contractions are associated with atrial fibrillation, brain ischaemia, and mortality: a  
52  
53 systematic review and meta-analysis. *Europace* 2018 doi: 10.1093/europace/euy276  
54  
55 [published Online First: 2018/12/07]  
56  
57
- 58  
59 13. Binici Z, Intzilakis T, Nielsen OW, et al. Excessive supraventricular ectopic activity and  
60  
increased risk of atrial fibrillation and stroke. *Circulation* 2010;121(17):1904-11. doi:  
10.1161/CIRCULATIONAHA.109.874982

- 1  
2  
3 14. Sejr MH, Riahi S, Larsen TB, et al. Premature atrial complexes in an ischemic stroke  
4  
5 population and risk of recurrent stroke: a systematic review. *Expert Rev Cardiovasc*  
6  
7 *Ther* 2017;15(6):447-55. doi: 10.1080/14779072.2017.1332992 [published Online  
8  
9 First: 2017/05/24]  
10  
11
- 12 15. Pinho J, Braga CG, Rocha S, et al. Atrial ectopic activity in cryptogenic ischemic stroke  
13  
14 and TIA: a risk factor for recurrence. *J Stroke Cerebrovasc Dis* 2015;24(2):507-10.  
15  
16 doi: 10.1016/j.jstrokecerebrovasdis.2014.09.029  
17  
18
- 19 16. Adams HP, Jr., Bendixen BH, Kappelle LJ, et al. Classification of subtype of acute  
20  
21 ischemic stroke. Definitions for use in a multicenter clinical trial. TOAST. Trial of  
22  
23 Org 10172 in Acute Stroke Treatment. *Stroke* 1993;24(1):35-41.  
24  
25
- 26 17. Clinical guidelines for stroke management 2010. *National Stroke Foundation Melbourne*  
27  
28 *Australia* 2010  
29  
30
- 31 18. Todo K, Moriwaki H, Saito K, et al. Frequent premature atrial contractions in stroke of  
32  
33 undetermined etiology. *Eur Neurol* 2009;61(5):285-8. doi: 10.1159/000206853  
34  
35
- 36 19. Engstrom G, Hedblad B, Juul-Moller S, et al. Cardiac arrhythmias and stroke: increased  
37  
38 risk in men with high frequency of atrial ectopic beats. *Stroke* 2000;31(12):2925-9.  
39
- 40 20. Acharya T, Tringali S, Bhullar M, et al. Frequent Atrial Premature Complexes and Their  
41  
42 Association With Risk of Atrial Fibrillation. *Am J Cardiol* 2015;116(12):1852-7. doi:  
43  
44 10.1016/j.amjcard.2015.09.025 [published Online First: 2015/11/28]  
45  
46
- 47 21. Murakoshi N, Xu D, Sairenchi T, et al. Prognostic impact of supraventricular premature  
48  
49 complexes in community-based health checkups: the Ibaraki Prefectural Health Study.  
50  
51 *Eur Heart J* 2015;36(3):170-8. doi: 10.1093/eurheartj/ehu407 [published Online First:  
52  
53 2014/11/02]  
54  
55  
56  
57  
58  
59  
60

- 1  
2  
3 22. Kamel H, Elkind MS, Bhave PD, et al. Paroxysmal supraventricular tachycardia and the  
4 risk of ischemic stroke. *Stroke* 2013;44(6):1550-4. doi:  
5  
6 10.1161/STROKEAHA.113.001118 [published Online First: 2013/05/02]  
7  
8  
9  
10 23. Kistler PM, Sanders P, Fynn SP, et al. Electrophysiologic and electroanatomic changes in  
11 the human atrium associated with age. *J Am Coll Cardiol* 2004;44(1):109-16. doi:  
12  
13 10.1016/j.jacc.2004.03.044  
14  
15  
16  
17 24. Medi C, Kalman JM, Spence SJ, et al. Atrial electrical and structural changes associated  
18 with longstanding hypertension in humans: implications for the substrate for atrial  
19 fibrillation. *J Cardiovasc Electrophysiol* 2011;22(12):1317-24. doi: 10.1111/j.1540-  
20  
21 8167.2011.02125.x  
22  
23  
24  
25  
26 25. Oakes RS, Badger TJ, Kholmovski EG, et al. Detection and quantification of left atrial  
27 structural remodeling with delayed-enhancement magnetic resonance imaging in  
28 patients with atrial fibrillation. *Circulation* 2009;119(13):1758-67. doi:  
29  
30 10.1161/CIRCULATIONAHA.108.811877  
31  
32  
33  
34  
35 26. Diez J. Mechanisms of cardiac fibrosis in hypertension. *J Clin Hypertens (Greenwich)*  
36 2007;9(7):546-50.  
37  
38  
39  
40 27. Perticone F, Ceravolo R, Pujia A, et al. Prognostic significance of endothelial dysfunction  
41 in hypertensive patients. *Circulation* 2001;104(2):191-6.  
42  
43  
44  
45 28. Yaghi S, Moon YP, Mora-McLaughlin C, et al. Left atrial enlargement and stroke  
46 recurrence: the Northern Manhattan Stroke Study. *Stroke* 2015;46(6):1488-93. doi:  
47  
48 10.1161/STROKEAHA.115.008711  
49  
50  
51  
52  
53  
54  
55  
56  
57  
58  
59  
60

1  
2  
3  
4  
5  
6  
7  
8  
9  
10  
11  
12  
13  
14  
15  
16  
17  
18 **Figure Legend**

19  
20  
21 **Figure 1.**

22  
23  
24 Patient selection: inclusions and exclusions.

25  
26  
27 AF = atrial fibrillation; CABG = coronary artery bypass grafting; COPD = chronic  
28 obstructive pulmonary disease; TIA = transient ischaemic attack;

29  
30  
31  
32 **Figure 2.**

33  
34  
35 Median PACs by CHA<sub>2</sub>DS<sub>2</sub>VASc score for control and stroke/TIA groups.

36  
37  
38 CHA<sub>2</sub>DS<sub>2</sub>VASc = risk score for ischaemic stroke; TIA = transient ischaemic attack;

1  
2  
3  
4  
5  
6  
7  
8  
9  
10  
11  
12  
13  
14  
15  
16  
17  
18 **Tables**  
19  
20

21 **Table 1.** Baseline characteristics of study participants.  
22  
23

| Characteristics                         | Control<br>n = 251<br>n (%) | Stroke/TIA<br>n = 461<br>n (%) | P value |
|-----------------------------------------|-----------------------------|--------------------------------|---------|
| Age, y (SD)                             | 70.5 (11.6)                 | 69.8 (12.5)                    | 0.45    |
| Sex, Female                             | 88 (35.1)                   | 195 (42.3)                     | 0.06    |
| <b>Stroke Subtypes</b>                  |                             |                                |         |
| Large vessel<br>atherosclerosis         | -                           | 82 (17.8)                      | -       |
| Small vessel occlusion                  | -                           | 86 (18.7)                      | -       |
| Cryptogenic                             | -                           | 291(63.1)                      | -       |
| Stroke of other determined<br>aetiology | -                           | 2 (0.4)                        | -       |
| <b>Vascular Risk Factors</b>            |                             |                                |         |
| Hypertension                            | 130 (51.8)                  | 294 (63.8)                     | 0.01    |
| Dyslipidaemia                           | 91 (36.3)                   | 209 (45.3)                     | 0.02    |
| Diabetes Mellitus                       | 38 (15.1)                   | 113 (24.5)                     | 0.01    |

24  
25  
26  
27  
28  
29  
30  
31  
32  
33  
34  
35  
36  
37  
38  
39  
40  
41  
42  
43  
44  
45  
46  
47  
48  
49  
50  
51  
52  
53  
54  
55  
56  
57  
58  
59  
60

|                                                          |               |               |        |
|----------------------------------------------------------|---------------|---------------|--------|
| Any Smoking                                              | 44 (17.5)     | 118 (25.6)    | 0.01   |
| Previous Stroke/TIA                                      | 0 (0)         | 79 (17.1)     | <0.001 |
| Myocardial Infarction                                    | 40 (15.9)     | 82 (17.8)     | 0.53   |
| Peripheral Vascular Disease                              | 5 (2.0)       | 26 (5.6)      | 0.02   |
| Sleep Apnoea                                             | 14 (5.6)      | 13 (2.8)      | 0.07   |
| History of Heart Failure                                 | 11 (4.4)      | 25 (5.4)      | 0.55   |
| CHA <sub>2</sub> DS <sub>2</sub> VASc score median (IQR) | 2 (1 – 3)     | 5 (4 – 5)     | <0.001 |
| <b>Medications</b>                                       |               |               |        |
| Warfarin                                                 | 4 (1.6)       | 4 (0.9)       | 0.38   |
| Direct Oral Anticoagulant                                | 4 (1.6)       | 1 (0.2)       | -      |
| Antiplatelet Therapy                                     | 81 (32.3)     | 165 (35.8)    | 0.35   |
| Beta blocker                                             | 48 (19.1)     | 82 (17.8)     | 0.66   |
| Ace Inhibitor                                            | 105 (41.8)    | 224 (48.6)    | 0.08   |
| Statin                                                   | 79 (31.5)     | 187 (40.6)    | 0.02   |
| <b>Premature Atrial Complexes</b>                        |               |               |        |
| PACs/24 hours median (IQR)                               | 37 (13 - 115) | 62 (20 - 208) | <0.01  |
| Longest atrial run median (IQR)                          | 3 (0 – 7)     | 3 (0 – 8)     | <0.01  |
| Atrial runs >3 beats median (IQR)                        | 1 (0 – 2)     | 1 (0 – 4)     | 0.07   |

|                          |           |            |        |
|--------------------------|-----------|------------|--------|
| $\geq 200$ PACs/24 hours | 37 (14.7) | 118 (25.6) | <0.001 |
| $\geq 20$ beats in runs  | 13 (5.2)  | 27 (5.9)   | 0.71   |

SD = standard deviation; TIA = transient ischaemic attack; IQR = interquartile range; PAC = premature atrial complexes; The data is presented as n (%), unless otherwise stated.

**Table 2.** Multivariate analysis: risk factors associated with Stroke/TIA and cryptogenic stroke.

| Characteristic                    | Stroke/TIA          |         | Cryptogenic Stroke  |         |
|-----------------------------------|---------------------|---------|---------------------|---------|
|                                   | Odds Ratio (95% CI) | P value | Odds Ratio (95% CI) | P value |
| <b>Female</b>                     | 1.51 (1.09 - 2.11)  | <0.05   | 1.78 (1.19 – 2.67)  | <0.01   |
| <b>Hypertension</b>               | 1.53 (1.07 - 2.17)  | <0.05   | 1.67 (1.05 – 2.64)  | <0.05   |
| <b>Smoking</b>                    | 1.58 (1.06 - 2.36)  | <0.05   | 1.55 (0.95 – 2.53)  | 0.08    |
| <b><math>\geq 200</math> PACs</b> | 1.97 (1.29 - 3.02)  | <0.01   | 1.95 (1.16 – 3.28)  | <0.05   |

CI = confidence interval; PAC = premature atrial complexes.

*Variables adjusted in the multivariate model: Age, sex, excessive premature atrial complexes, hypertension, diabetes mellitus, smoking, dyslipidaemia, peripheral vascular disease and sleep apnoea*

**Table 3.** Multivariate analysis: Vascular risk factors associated with excessive PACs in all patients.

| <b>Risk factor</b>       | <b>Odds Ratio (95% CI)</b> | <b>P value</b> |
|--------------------------|----------------------------|----------------|
| <b>Age</b>               |                            |                |
| <b>65 – 74</b>           | 2.52 (1.42 - 4.45)         | <0.01          |
| <b>≥ 75</b>              | 3.64 (2.08 - 6.36)         | <0.01          |
| <b>Hypertension</b>      | 1.54 (1.01 - 2.34)         | <0.05          |
| <b>Diabetes Mellitus</b> | 1.41 (0.91 - 2.20)         | 0.13           |

CI = confidence interval.

*Variables adjusted in the multivariate model: Age: <65, 65-74, ≥75, gender, hypertension, diabetes mellitus, smoking, dyslipidaemia, peripheral vascular disease, sleep apnoea.*



### Author Statement

JS led and designed the study, collated and analysed data and wrote the manuscript. AK collated and analysed the data and revised the manuscript. HD contributed to study design and revised the manuscript. JK contributed to study design and revised the manuscript. KR collated and analysed the data and revised the manuscript. MT collated and analysed the data and revised the manuscript. MS analysed the data and revised the manuscript. LR contributed to study design and revised the manuscript. JC contributed to study design and revised the manuscript. MW contributed to study design and revised the manuscript. TF collated and analysed the data and revised the manuscript. AT supervised and designed the study revised the manuscript. All authors read and approved the final manuscript.

1  
2  
3  
4  
5  
6  
7  
8  
9  
10  
11  
12  
13  
14  
15  
16  
17  
18  
19  
20  
21  
22  
23  
24  
25  
26  
27  
28  
29  
30  
31  
32  
33  
34  
35  
36  
37  
38  
39  
40  
41  
42  
43  
44  
45  
46  
47  
48  
49  
50  
51  
52  
53  
54  
55  
56  
57  
58  
59  
60

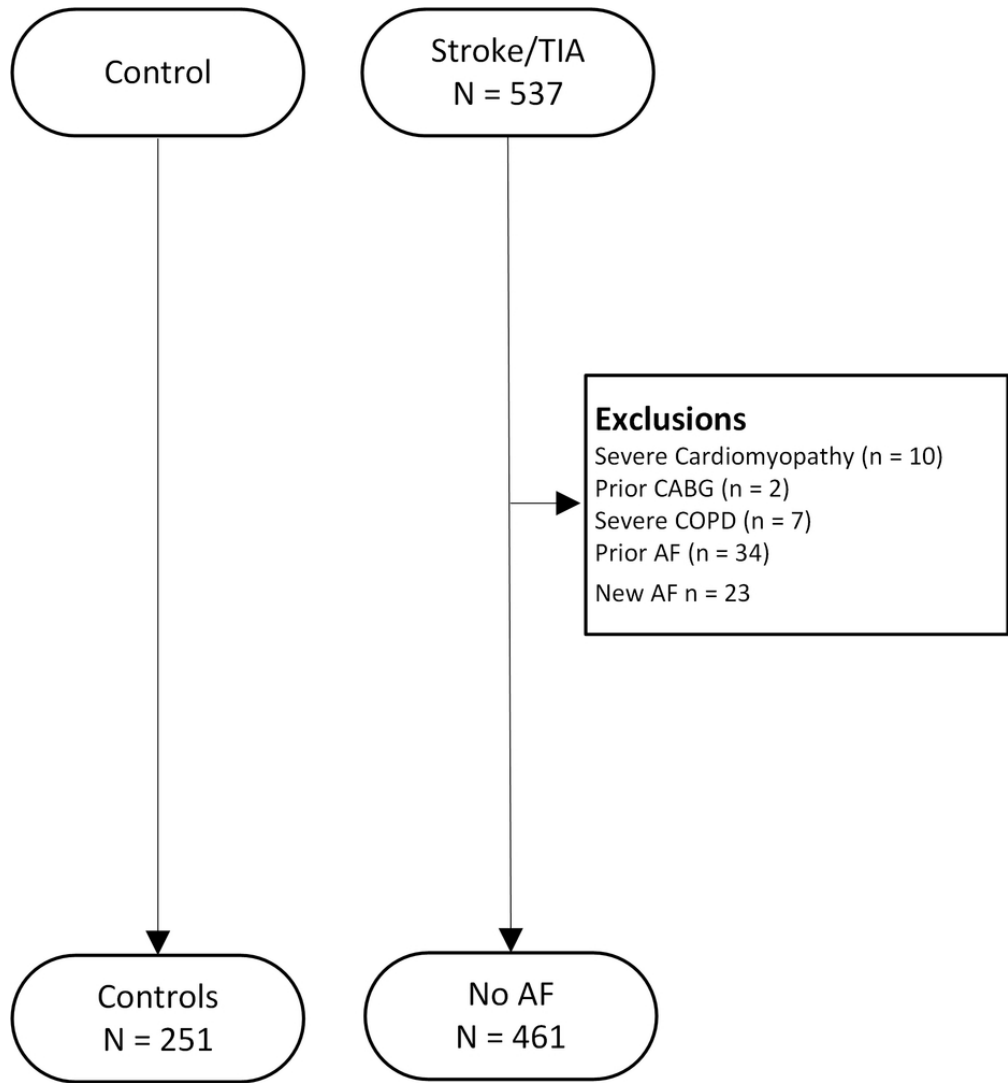

Patient selection: inclusions and exclusions.  
AF = atrial fibrillation; CABG = coronary artery bypass grafting; COPD = chronic obstructive pulmonary disease; TIA = transient ischaemic attack;

78x84mm (300 x 300 DPI)



Median PACs by CHA<sub>2</sub>DS<sub>2</sub>VASc score for control and stroke/TIA groups.  
CHA<sub>2</sub>DS<sub>2</sub>VASc = risk score for ischaemic stroke; TIA = transient ischaemic attack;

127x74mm (300 x 300 DPI)

## Supplemental Data

**Table 1.** Multivariate analysis: risk factors associated with Stroke/TIA; Excessive PACs defined as >100 PACs/24 hours

| Characteristic        | Stroke/TIA          |         |
|-----------------------|---------------------|---------|
|                       | Odds Ratio (95% CI) | P value |
| <b>Female</b>         | 1.54 (1.10 - 2.14)  | <0.05   |
| <b>Hypertension</b>   | 1.46 (1.04 - 2.07)  | <0.05   |
| <b>Smoking</b>        | 1.57 (1.06 - 2.35)  | <0.05   |
| <b>Excessive PACs</b> | 1.57 (1.10 - 2.25)  | <0.05   |

CI = confidence interval; PAC = premature atrial complexes.

*Variables adjusted in the multivariate model: Age, sex, excessive premature atrial complexes, hypertension, diabetes mellitus, smoking, dyslipidaemia, peripheral vascular disease and sleep apnoea*

**Table 2.** Multivariate analysis: risk factors associated with Stroke/TIA; Excessive PACs defined as >700 PACs/24 hours or an atrial run >20 beats

| Characteristic        | Stroke/TIA          |         |
|-----------------------|---------------------|---------|
|                       | Odds Ratio (95% CI) | P value |
| <b>Female</b>         | 1.63 (1.16 - 2.27)  | <0.01   |
| <b>Hypertension</b>   | 1.45 (1.03 - 2.05)  | <0.05   |
| <b>Smoking</b>        | 1.59 (1.06 - 2.37)  | <0.05   |
| <b>Excessive PACs</b> | 3.22 (1.78 - 5.83)  | <0.01   |

CI = confidence interval; PAC = premature atrial complexes.

*Variables adjusted in the multivariate model: Age, sex, excessive premature atrial complexes, hypertension, diabetes mellitus, smoking, dyslipidaemia, peripheral vascular disease and sleep apnoea*
