# Supplementary material for: Association between excessive premature atrial complexes and cryptogenic stroke: results of a case–control study
Source: PubMed Central journal article supplement — BMJ Open. 2019 Jul 31;9(7):e029164. doi: 10.1136/bmjopen-2019-029164 (PMC6678064; doi:10.1136/bmjopen-2019-029164), 2019-07-31
Supplement: bmjopen-2019-029164supp001.pdf [file bmjopen-2019-029164supp001.pdf]

## Supplemental Data

**Table 1.** Multivariate analysis: risk factors associated with Stroke/TIA; Excessive PACs defined as >100 PACs/24 hours

| <b>Characteristic</b> | <b>Stroke/TIA</b>          |                |
|-----------------------|----------------------------|----------------|
|                       | <i>Odds Ratio (95% CI)</i> | <i>P value</i> |
| <b>Female</b>         | 1.54 (1.10 - 2.14)         | <0.05          |
| <b>Hypertension</b>   | 1.46 (1.04 - 2.07)         | <0.05          |
| <b>Smoking</b>        | 1.57 (1.06 - 2.35)         | <0.05          |
| <b>Excessive PACs</b> | 1.57 (1.10 - 2.25)         | <0.05          |

CI = confidence interval; PAC = premature atrial complexes.

*Variables adjusted in the multivariate model: Age, sex, excessive premature atrial complexes, hypertension, diabetes mellitus, smoking, dyslipidaemia, peripheral vascular disease and sleep apnoea*

**Table 2.** Multivariate analysis: risk factors associated with Stroke/TIA; Excessive PACs defined as >700 PACs/24 hours or an atrial run >20 beats

| <b>Characteristic</b> | <b>Stroke/TIA</b>          |                |
|-----------------------|----------------------------|----------------|
|                       | <i>Odds Ratio (95% CI)</i> | <i>P value</i> |
| <b>Female</b>         | 1.63 (1.16 - 2.27)         | <0.01          |
| <b>Hypertension</b>   | 1.45 (1.03 - 2.05)         | <0.05          |
| <b>Smoking</b>        | 1.59 (1.06 - 2.37)         | <0.05          |
| <b>Excessive PACs</b> | 3.22 (1.78 - 5.83)         | <0.01          |

CI = confidence interval; PAC = premature atrial complexes.

*Variables adjusted in the multivariate model: Age, sex, excessive premature atrial complexes, hypertension, diabetes mellitus, smoking, dyslipidaemia, peripheral vascular disease and sleep apnoea*
